# Supplementary material
Source: PubMed Central journal article supplement (PMC6436650)
Supplement: fj.201801110RR.sf5.pdf [file fj.201801110RR.sf5.pdf]

## Neurogenin 2

| Score           | Expect | Method                                                          | Identities   | Positives    | Gaps      |
|-----------------|--------|-----------------------------------------------------------------|--------------|--------------|-----------|
| 351 bits(901)   | 8e-128 | Compositional matrix adjust.                                    | 227/272(83%) | 243/272(89%) | 9/272(3%) |
| <b>Human</b>    |        | MFVKSETLELKEEEDVLVLLGSASPALAALTPLSSSADEEEEEEPGASGGARRQRGAEG     |              |              | 60        |
| <b>Mouse</b>    |        | MFVKSETLELKEEE+VL+LLGSASPA A LTP+SSSADEEE+EE G AR QRGAEAG       |              |              | 60        |
| <b>Human</b> 1  |        | QGARGGVAAGAEGCRPARLLGLVHDCRRRPSRARAVSRGAKTAE TVQRIKKTRRLKANNR   |              |              | 120       |
| <b>Mouse</b> 1  |        | QGARGGVAAGAEGCRPARLLGLVHDCRRRPSRARAVSRGAKTAE TVQRIKKTRRLKANNR   |              |              | 120       |
| <b>Human</b> 21 |        | ERNRMHNLNAALDALREVLPTFFPEDAKLTKIETLRF AHNYIWAL TETLRLADHCGGGGGG |              |              | 180       |
| <b>Mouse</b> 21 |        | ERNRMHNLNAALDALREVLPTFFPEDAKLTKIETLRF AHNYIWAL TETLRLADHC G GG  |              |              | 179       |
| <b>Human</b> 81 |        | LPGALFSEAVLLSPGGASAAALSSSGDSPSPASTW SCTNSPAPSSSVSSNSTSPYSCTLSP  |              |              | 240       |
| <b>Mouse</b> 80 |        | LPGALFSEAVLLSPG AAL +SGDSPSP S+W SCTN S + SSNSTSPYSCTLSP        |              |              | 232       |
| <b>Human</b> 41 |        | ASPAGSDMDYWQPPPPDKHRYAPHLPIARDCI                                | 272          |              |           |
| <b>Mouse</b> 43 |        | ASP-GSDVDYWQPPPPDKHRYAPHLPIARDCI                                | 263          |              |           |

## Neurogenin 1

| Score           | Expect | Method                                                        | Identities   | Positives    | Gaps      |
|-----------------|--------|---------------------------------------------------------------|--------------|--------------|-----------|
| 334 bits(857)   | 6e-122 | Compositional matrix adjust.                                  | 207/244(85%) | 214/244(87%) | 7/244(2%) |
| <b>Human</b>    |        | MPARLETTCISDLDCASSSGDL SGFL-TDEEDCARLQQAASASGPPAPARRGAPNISRAS |              |              | 59        |
| <b>Mouse</b>    |        | MPA LETCISDLDC+SS+ S TDEEDCARLQ AS SG PARR AP +S AS           |              |              | 60        |
| <b>Human</b> 0  |        | EVPGAQDDEQERRRRRGRTRVRSEALLHSLRRSRRVKANDRERNRMHNLNAALDALRSVL  |              |              | 119       |
| <b>Mouse</b> 1  |        | NVPGAQDEEQERRRRRGRARVRSEALLHSLRRSRRVKANDRERNRMHNLNAALDALRSVL  |              |              | 120       |
| <b>Human</b> 20 |        | PSFPDDTKLTKIETLRFAYNIWALAE TLR LADQGLPGGARERLLPPQCVCLPGPPSP   |              |              | 179       |
| <b>Mouse</b> 21 |        | PSFPDDTKLTKIETLRFAYNIWALAE TLR LADQGLPGGARERLLPPQCVCLPGPPSP   |              |              | 180       |
| <b>Human</b> 80 |        | ASDAESWGSAAAA-----SPLSDPSSPAASEDFTYRPGDPVFSFPLPKDLLHTTPCF     |              |              | 233       |
| <b>Mouse</b> 81 |        | ASD ESWGSAAAA+ SPLSDPSSP+ASEDFTY PGDP+FSFP LPKDLLHTTPCF       |              |              | 240       |
| <b>Human</b> 34 |        | IPYH 237                                                      |              |              |           |
| <b>Mouse</b> 41 |        | IPYH 244                                                      |              |              |           |
